# Supplementary material for: Bifidobacterium breve CCFM1025 Improves Sleep Quality via Regulating the Activity of the HPA Axis: A Randomized Clinical Trial
Source: MDPI journal article supplement (doi:10.3390/nu15214700), 2023-11-06
Supplement: s1 [file s1]

# Supplementary Material

## S1. Supplementary Methods

### S1.1. UPLC-MS Analysis Parameters

Samples were analyzed using an ItiMateU-3000 ultraperformance liquid-chromatography (UPLC) system (Thermo Fisher Scientific, MA, USA) coupled to a high-resolution Q- Exactive mass spectrometer (Thermo Fisher Scientific, MA, USA). A Waters Acquity UPLC T3 column (2.1 × 100 mm, 1.8  $\mu$ m) was used at an operating temperature of 30°C.

The mobile phases were A) 0.1% formic acid in negative mode or 5 mM ammonium acetate in negative mode and B) 100% acetonitrile. The analytical gradient was: 0–1 min, 5% B; 10 min, 99% B; 12 min, 99% B; 3.5 min, 95% B; 12.1 min, 5% B; 15 min, 5% B. The flow rate was 0.3 mL/min with an injection volume of 2  $\mu$ L for both phases. Samples were held at 4°C in the autosampler.

The Q Exactive was run with polarity switching (+3.80 kV/-3.20 kV) in full scan mode with an m/z range of 80–1050. The electrospray ionization (ESI) source conditions were set as follows: sheath gas flow of 40 psi, aus gas flow of 10 psi, capillary temperature of 320°C, and aus gas heater temperature of 350 °C. The normalized collision energy (NCE) was set to 20–40–60 eV.

## S2. Supplementary Figures and Tables

### S2.1. Supplementary Figures

TABLE 2. COMPARISON OF MEAN TOTAL PITTSBURGH SLEEP QUALITY INDEX SCORES AT 0, 2, AND 4 WEEKS OF INTERVENTION BETWEEN TWO GROUPS

| Group                                      | Baseline         | Second week      | Fourth week      | p-value within group | p-value between groups |
|--------------------------------------------|------------------|------------------|------------------|----------------------|------------------------|
| A (treatment), mean $\pm$ SD of total PSQI | 11.7 $\pm$ 3.20  | 9.17 $\pm$ 3.68  | 7.55 $\pm$ 3.79  | 0.001                | 0.001                  |
| B (placebo), mean $\pm$ SD of total PSQI   | 12.09 $\pm$ 2.66 | 10.69 $\pm$ 3.42 | 10.66 $\pm$ 3.55 | 0.007                |                        |

PSQI, Pittsburgh Sleep Quality Index; SD, standard deviation.

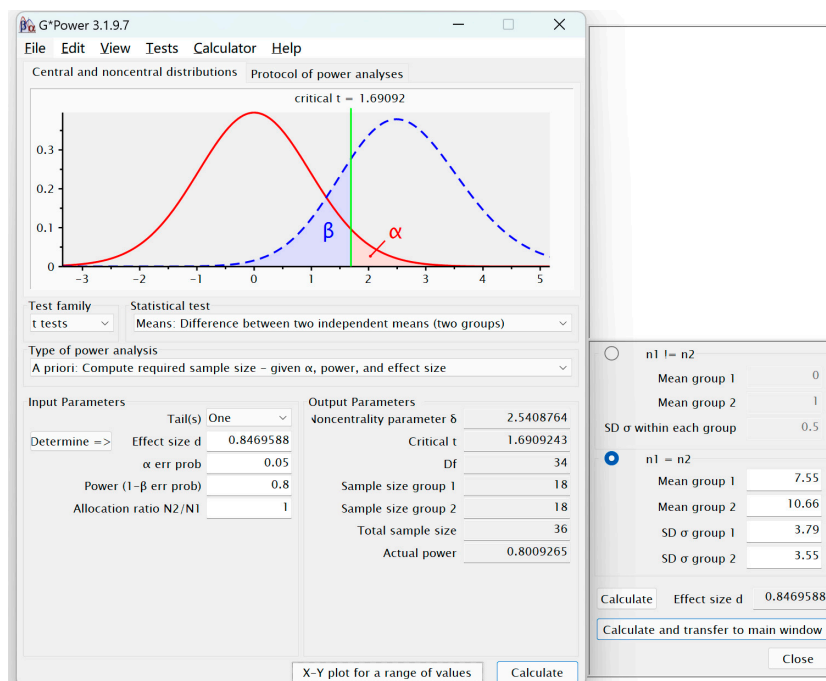

**Figure S1.** Power analysis. The estimated effect size was obtained from a published study that treat by comparing the mean difference of the Pittsburgh Sleep Quality Index score between the control and treated group.

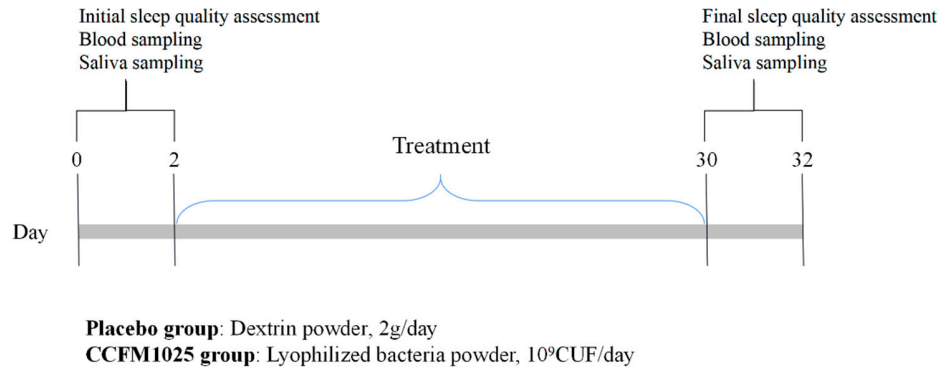

**Figure S2.** Experimental schedule.

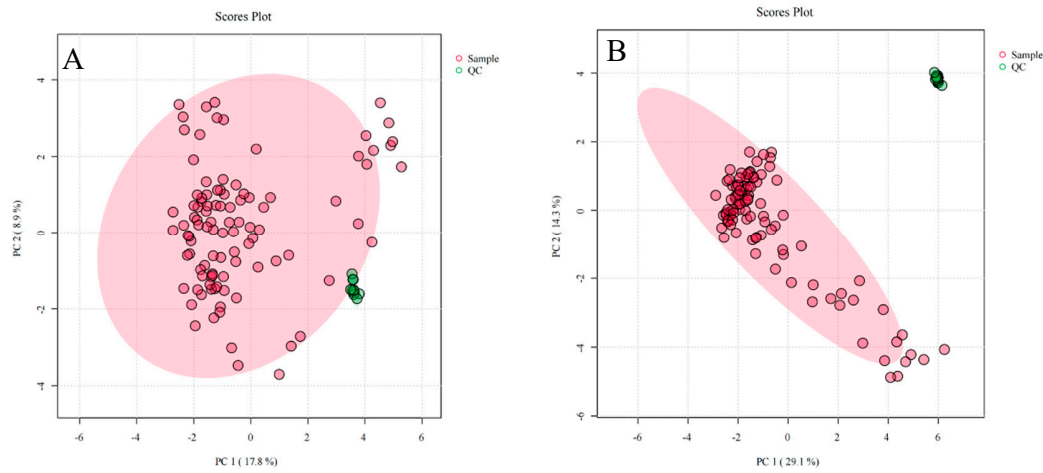

**Figure S3.** Quality control assessment (A) The PCA score plots for all serum samples containing QC samples in ESI+ mode. (B) The PCA score plots for all serum samples containing QC samples in ESI- mode.

## S2.2. Supplementary Tables

**Table S1.** Demographic Characteristics of all participants.

| Variable                           |                          | Healthy Control<br>(n = 20) | Sleep Disorders<br>(n = 40) | Statistic Value | p value            |
|------------------------------------|--------------------------|-----------------------------|-----------------------------|-----------------|--------------------|
| Age, Mean $\pm$ SD                 |                          | 34.35 $\pm$ 8.93            | 37.75 $\pm$ 10.88           | 1.207           | 0.232 <sup>a</sup> |
| BMI, Mean $\pm$ SD                 |                          | 22.76 $\pm$ 2.85            | 22.67 $\pm$ 3.14            | 0.108           | 0.915 <sup>a</sup> |
| Sex, n (%)                         | Female                   | 10 (50)                     | 26 (65)                     | 1.250           | 0.264 <sup>b</sup> |
|                                    | Male                     | 10 (50)                     | 14 (35)                     |                 |                    |
| Race, n (%)                        | Chinese, Han nationality | 20 (100)                    | 40 (100)                    | N/A             | N/A                |
| Medication before inclusion, n (%) |                          | 0 (0)                       | 0 (0)                       | N/A             | N/A                |
| Educational status, n (%)          | Primary                  | 0 (0)                       | 1 (2.5)                     | 1.717           | 0.633 <sup>b</sup> |
|                                    | Secondary                | 4 (20)                      | 7 (17.5)                    |                 |                    |
|                                    | Higher                   | 9 (45)                      | 23 (57.5)                   |                 |                    |
|                                    | Unknown                  | 7 (35)                      | 9 (22.5)                    |                 |                    |
| Alcohol use, n (%)                 | Non-drinker              | 17 (85)                     | 31 (77.5)                   | 0.469           | 0.494 <sup>b</sup> |
|                                    | Occasional drinker       | 3 (15)                      | 9 (22.5)                    |                 |                    |
| Smokers, n (%)                     | Non-smoker               | 15 (75)                     | 29 (72.5)                   | 0.04            | 0.837 <sup>b</sup> |
|                                    | Smoker                   | 5 (25)                      | 11 (27.5)                   |                 |                    |

n, number of participants; N/A, not available; <sup>a</sup> Statistical analysis by t-test; <sup>b</sup> Statistical analysis by chi square test.

**Table S2.** Statistical Summary of PSQI and AIS.

|                                  |      | M (SD)        | F Value | p Value | Change        | p Value |
|----------------------------------|------|---------------|---------|---------|---------------|---------|
| CCFM 1025-PSQI                   | pre  | 11.60 (3.169) | 15.41   | 0.0007  | 3.850 (3.602) | 0.0419  |
|                                  | post | 7.75 (3.697)  |         |         |               |         |
| Placebo-PSQI                     | pre  | 10.10 (2.293) |         | 0.4316  | 1.450 (3.605) |         |
|                                  | post | 8.65 (2.793)  |         |         |               |         |
| CCFM 1025-PSQI sleep quality     | pre  | 2.4 (0.598)   | 18.19   | 0.004   | 0.9 (0.9119)  | 0.0435  |
|                                  | post | 1.5 (0.827)   |         |         |               |         |
| Placebo-PSQI sleep quality       | pre  | 2.05 (0.394)  |         | 0.2557  | 0.35 (0.7452) |         |
|                                  | post | 1.65 (0.813)  |         |         |               |         |
| CCFM 1025-PSQI Sleep disturbance | pre  | 1.65 (0.745)  | 0.937   | 0.038   | 0.6 (0.8826)  | 0.0032  |
|                                  | post | 1.05 (0.605)  |         |         |               |         |
| Placebo-PSQI Sleep disturbance   | pre  | 1.4 (0.681)   |         | 0.5226  | -0.3 (0.9234) |         |
|                                  | post | 1.7 (0.733)   |         |         |               |         |
| CCFM 1025-AIS                    | pre  | 11.5 (4.395)  | 13.46   | 0.0155  | 2.8 (6.058)   | 0.4601  |
|                                  | post | 7.45 (2.282)  |         |         |               |         |
| Placebo-AIS                      | pre  | 12.75 (4.411) |         | 0.1588  | 4.05 (4.407)  |         |
|                                  | post | 9.95 (5.073)  |         |         |               |         |

**Table S3.** Statistical Summary of stress markers.

|                             |      | M (SD)        | F Value | P Value | Change         | P Value |
|-----------------------------|------|---------------|---------|---------|----------------|---------|
| CCFM 1025-salivary cortisol | pre  | 16.72 (1.570) | 1.67    | 0.0564  | 1.369 (1.118)  | 0.0019  |
|                             | post | 15.35 (1.322) |         |         |                |         |
| Placebo-salivary cortisol   | pre  | 15.74 (1.967) |         | 0.8768  | -5.222 (3.181) |         |
|                             | post | 16.14 (1.788) |         |         |                |         |
| CCFM 1025-plasma cortisol   | pre  | 17.94 (4.758) | 0.088   | 0.5058  | 2.210 (4.593)  | 0.0312  |
|                             | post | 15.49 (5.748) |         |         |                |         |
| Placebo-plasma cortisol     | pre  | 16.26 (5.172) |         | 0.7626  | -1.716 (6.364) |         |
|                             | post | 17.97 (6.392) |         |         |                |         |
| CCFM 1025-plasma ACTH       | pre  | 51.03(26.48)  | 1.66    | 0.3141  | 13.56 (21.37)  | 0.0605  |
|                             | post | 37.47(18.40)  |         |         |                |         |
| Placebo-plasma ACTH         | pre  | 39.69(22.39)  |         | 0.9997  | 0.6685 (20.78) |         |
|                             | post | 38.93(25.02)  |         |         |                |         |

**Table S4.** The VIP value of compounds.

| CCFM1025 | Compounds               | VIP         | placebo | Compounds                     | VIP         |
|----------|-------------------------|-------------|---------|-------------------------------|-------------|
|          | Choline                 | 3.155359214 |         | Hippuric acid                 | 2.926772503 |
|          | Gentian violet          | 3.087027905 |         | Gentian violet                | 2.641905497 |
|          | Oleamide                | 2.651032453 |         | Sphingosine                   | 2.586327598 |
|          | Daidzein                | 2.171505646 |         | Valeric acid                  | 2.477216246 |
|          | Pentadecanoic acid      | 2.162228648 |         | Benzoic acid                  | 2.472313739 |
|          | Acetylcholine           | 2.136958751 |         | Pentaerythritol               | 2.378509372 |
|          | L-Citrulline            | 1.991798719 |         | 2-Amino-1,3,4-octadecanetriol | 2.343947886 |
|          | Isobutyric acid         | 1.982251453 |         | 1-Methylxanthine              | 2.230131108 |
|          | Creatine                | 1.855916438 |         | Daidzein                      | 2.220437489 |
|          | Isoleucine              | 1.85155352  |         | Eicosapentaenoic acid         | 2.05729217  |
|          | 2-Naphthol              | 1.849716433 |         | Glycochenodeoxycholic acid    | 2.056884017 |
|          | L-Threonine             | 1.823269132 |         | Taurochenodeoxycholic Acid    | 1.959494064 |
|          | Dehydroacetic acid      | 1.808040047 |         | Cyclamic acid                 | 1.949377734 |
|          | 2-Arachidonoyl glycerol | 1.790125658 |         | Ethyl violet                  | 1.945619459 |
|          | DL-Glutamine            | 1.757140366 |         | Hexanoic acid                 | 1.922604942 |
|          | Piperine                | 1.748600042 |         | Nonanoic acid                 | 1.895399338 |
|          | Phytosphingosine        | 1.707309813 |         | 11-Deoxy prostaglandin F2     | 1.866562055 |
|          | Phloretin               | 1.684861605 |         | 4-Chlorophenoxyacetic acid    | 1.85721913  |
|          | Eicosenoic acid         | 1.664419617 |         | Theophylline                  | 1.854572555 |
|          | 2-Furoic acid           | 1.646239615 |         | Theobromine                   | 1.828376463 |
